RESEARCH ARTICLE

# Role of Environmental Pollutants in Liver Physiology: Special References to Peoples Living in the Oil Drilling Sites of Assam

Tapan Dey, Kabita Gogoi, Balagopalan Unni\*, Moonmee Bharadwaz, Munmi Kalita, Dibyajyoti Ozah, Manoj Kalita, Jatin Kalita, Pranab Kumar Baruah, Thaneswar Bora

Biotechnology Division, Council of Scientific & Industrial Research—North-East Institute of Science and Technology, Jorhat, Assam, India

\* [bgunni@yahoo.com](mailto:bgunni@yahoo.com)

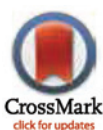

**OPEN ACCESS**

**Citation:** Dey T, Gogoi K, Unni B, Bharadwaz M, Kalita M, Ozah D, et al. (2015) Role of Environmental Pollutants in Liver Physiology: Special References to Peoples Living in the Oil Drilling Sites of Assam. PLoS ONE 10(4): e0123370. doi:10.1371/journal.pone.0123370

**Academic Editor:** J.Christopher States, University of Louisville, UNITED STATES

**Received:** July 26, 2014

**Accepted:** February 25, 2015

**Published:** April 13, 2015

**Copyright:** © 2015 Dey et al. This is an open access article distributed under the terms of the [Creative Commons Attribution License](https://creativecommons.org/licenses/by/4.0/), which permits unrestricted use, distribution, and reproduction in any medium, provided the original author and source are credited.

**Data Availability Statement:** All relevant data are within the paper.

**Funding:** The project was entirely funded by Council of Scientific and Industrial Research, Department of Scientific & Industrial Research. New Delhi, Government of India. The funders had no role in study design, data collection and analysis, decision to publish, or preparation of the manuscript.

**Competing Interests:** The authors have declared that no competing interests exist.

## Abstract

The populations residing near polluted sites are more prone to various types of diseases. The important causes of air pollution are the suspended particulate matter, respirable suspended particulate matter, sulfur dioxide and nitrogen dioxide. As limited information is available enumerating the effect of these pollutants on liver physiology of the population living near the polluted sites; in the present study, we tried to investigate their effect on liver of the population residing near the oil drilling sites since birth. In this study, a randomly selected 105 subjects (46 subjects from oil drilling site and 61 subjects from control site) aged above 30 years were taken under consideration. The particulate matter as well as the gaseous pollutants, sulfur dioxide and nitrogen dioxide, were analyzed through a respirable dust sampler. The level of alkaline phosphatase, alanine transaminase and aspartate transaminase enzymes in serum were measured by spectrophotometer. The generalized regression model studies suggests a higher concentration of respirable suspended particulate matter, suspended particulate matter and nitrogen dioxide lowers the alkaline phosphatase level ( $p < 0.0001$ ) by 3.5 times (95% CI 3.1-3.9), 1.5 times (95% CI 1.4 - 1.6) and 12 times (95% CI 10.74 -13.804), respectively in the exposed group. The higher concentration of respirable suspended particulate matter and nitrogen dioxide in air was associated with increase in alanine transaminase level ( $p < 0.0001$ ) by 0.8 times (95% CI 0.589-1.049) and by 2.8 times (95% CI 2.067-3.681) respectively in the exposed group. The increase in nitrogen dioxide level was also associated with increase in aspartate transaminase level ( $p < 0.0001$ ) by 2.5 times (95% CI 1.862 – 3.313) in the exposed group as compared to control group. Thus, the study reveals that long-term exposure to the environmental pollutants may lead to liver abnormality or injury of populations living in polluted sites.

## Introduction

Oil Spillage has always been a prominent reason for causing air pollution around the oil drilling sites. Many epidemiological studies have suggested the environmental pollutants due to oil spillage play a major role in developing various kinds of respiratory problems such as chronic obstructive pulmonary disease (COPD), asthma and other related diseases [1]. Many investigators have correlated the concentration of environmental pollutants to different respiratory diseases of human beings [2, 3]. Recently, few epidemiological studies showed the impact of large marine oil spills affecting the health of cleanup operators [1, 4]. They studied the persistence of functional and biological respiratory health effects after 6 years of completion of the cleanup work and found no clear differences between highly exposed and moderately exposed cleanup workers [4]. It is also reported that, the higher concentrations of sulphur dioxide (SO<sub>2</sub>) and nitrogen dioxide (NO<sub>2</sub>) pollutants were significantly related to symptoms of respiratory ailments in children [5].

Among other investigations, Amdur et al. (1953) [6] examined the responses of breathing exposed up to 8 ppm SO<sub>2</sub> in one of the first controlled studies in male populations. They observed that SO<sub>2</sub> is responsible for a change in respiratory pattern of the subjects. Schwartz et al. (1987) [7] examined daily mortality and suspended particulate matter level in air using Poisson regression model in Philadelphia and have found a significant association of suspended matter level and mortality. Extensive human exposures to mixtures of ozone and NO<sub>2</sub> have typically resulted in declined pulmonary function [8, 9]. However, the data for human exposures to NO<sub>2</sub> lacks consistency and reproducibility as the two groups initially reported small changes in lung functions associated with NO<sub>2</sub> exposure in asthmatics [9, 10] but subsequently they were unable to replicate their findings. Nevertheless, NO<sub>2</sub> exposure can make the subjects more susceptible to asthma and COPD [11].

Gene susceptibility along with environmental contaminants was found to be responsible for the severity of COPD [12, 13]. Although, there is significant data suggesting the effect of environmental pollutants in respiratory diseases, the data on the impact on the liver at blood biochemical level is limited. Earlier, we conducted a number of surveys around different polluted sites (oil drilling site, coal mines, paper mill area) where we recorded a large number of the population facing serious health related problems due to environmental pollutants. During the health survey, it was observed that most of the populations residing near the oil drilling sites have the history of anorexia, nausea, progressive weakness and weight loss. The manifestations observed in the exposed group were mainly due to hepatobiliary insufficiency. Therefore, the present study was taken up to assess long-term exposure effect of environmental pollutants on liver parameters among the population residing near the oil drilling sites since birth.

## Methods

### Health survey and sample collection

A health survey was conducted among the inhabitant residing near the oil drilling sites at Borholla of Assam. People aged more than 30 years were considered for the study. The study site is within 5 Sq. Km from the drilling site. 105 subjects were enrolled in the study (46 samples from near oil drilling site and 61 subjects from control site). The subjects are selected independently with equal probabilities applying Simple Random Sampling (SRS). The control site was 120 Kilometers away from the oil drilling sites. There was no existence of any industries near the residence of control population.

Collection of blood sample was done according to the guidelines of Indian Council of Medical Research and with the approval of the Institutional Ethics Committee, CSIR-North East

Institute of Science & Technology, Jorhat. Written consents were taken from the blood donors for the study.

## Environmental pollution assessment

Environmental pollutants were assessed with the help of a Respirable Dust Sampler (Enviro-tech, Model APM 460 BL) and data was calculated for respirable suspended particulate matter (RSPM) and suspended particulate matter (SPM). Determination of SO<sub>2</sub> in ambient air was done with the help of modified West and Gaeke Method and NO<sub>2</sub> were determined by Sodium Arsenite Method (as per manufacturer's instructions by the Central Pollution Control Board, Government of India). A distant area located at 120 Kilometers away from the polluted site served as control site for air analysis. The air dust samples were collected in glass microfiber filter papers of pore size 1.6 μM.

## Blood Biochemistry assessment

The liver function test parameters considered for study were alanine transaminase (ALT), aspartate transaminase (AST), alkaline phosphatase (ALP), total bilirubin (TB), direct bilirubin (DB), total protein (TP) and albumin (ALB). Biochemical analysis was done for all the blood samples collected from the subjects at polluted sites as well as the control sites.

Modified IFCC method (UV Kinetic) was used to find out ALT and AST level in blood serum at 340 nm. The Modified Kind & King's method (End Point Abs.) was used to find out alkaline phosphates in serum at 510 nm. Modified Jendrassik & Grof's method (End Point) was used to find out DB & the TB level in serum at 546 nm. The Bromocresol Green (BCG) method (End Point) was used to find out ALB levels in serum at 630 nm. The TP level determination was carried out through Biuret method (End Point) and measured at 550 nm. The reference ranges for all the parameters were set according to Longo et al. (2011) [14] as Total Bilirubin (TB): 0.4 – 1mg/dl, Direct Bilirubin (DB): 0.0–0.2 mg/dl, Total Protein (TP): 6.0–8.0 gm/dl, Albumin 3.5–5.2 gm/dl, ALT: 37U/L, AST: 37U/L and ALP: 100–280 U/L. All above assays were taken by using a Spectrophotometer (PG Instruments Ltd.).

## Statistical analysis

The association of ALP, ALT, AST, TB, DB, TP and ALB with the exposed/unexposed population was determined by Student's t-test. The generalized regression analysis (95% Confidence Interval and p value) were calculated to find out the association of the liver parameters with the levels of respirable dust particulate matter, suspended particulate matter and NO<sub>2</sub>. The statistical analyses were done by using SPSS v14 and GraphPad—Prism 5 software.

## Results

The baseline characteristics of both the exposed and control groups were shown in [Table 1](#). The body mass index (BMI) of the exposed group was found to be significantly lower (P value < 0.05) as compared to control population irrespective of gender. The mean age difference between the exposed and control population was statistically insignificant.

Air sample analysis was done throughout a year both in oil drilling sites and in the control sites for all the variables such as respirable suspended particulate matter, suspended particulate matter, SO<sub>2</sub> and NO<sub>2</sub>. Air samples collected from 120 Kilometers distant areas was served as control. The concentrations of all the variables under consideration were found to be higher than the control site. The level of respirable suspended particulate matter and suspended particulate matter was found to be higher two times and three times, respectively in drilling site

**Table 1. Baseline Characteristics of exposed and unexposed group.**

|                       | Exposed Group<br>(n = 46) | Unexposed Group(n = 61) | P value                |
|-----------------------|---------------------------|-------------------------|------------------------|
| Male                  | 48.89±1.81 (n = 26)       | 48.21±1.75 (n = 29)     | P = 0.79 <sup>NS</sup> |
| Female                | 41.80±1.93 (n = 20)       | 46.72±2.06 (n = 32)     | P = 0.11 <sup>NS</sup> |
| Mean Age              | 48.89 (30–73)             | 48.21 (30–80)           |                        |
| Body Mass Index (BMI) |                           |                         |                        |
| Male: Male            | 15.37±0.78                | 19.44±1.01              | P = 0.0029**           |
| Female: Female        | 14.70±0.76                | 18.26±0.91              | P = 0.0087**           |

All values are expressed as Mean ± SEM (Standard Error of Mean), P value <0.05 considered as significant;

\*\* = Significant,

<sup>NS</sup> = Not Significant, n = number of samples/observation (Values were expressed up to two decimal point).

doi:10.1371/journal.pone.0123370.t001

than the control site (Table 2). The concentrations of the gaseous compound, NO<sub>2</sub>, were found to be two times higher than the control site.

The blood biochemical level studies showed that the mean values of ALT (59.30±4.90) and AST (61.02±3.90) are higher and ALP (48.04±7.175) level is lower in exposed population than the control population. Student t-test revealed that these differences were statistically significant (Table 3). Other features such as bilirubin (direct and total), albumin and total protein levels of the exposed population were found to be in normal range and lie statistically different from controls.

The effect of the environmental pollutants on the ALP, AST and ALT was also evaluated by regression analysis (Table 4). The results of the generalized regression analysis reveals that environmental RSPM, SPM and NO<sub>2</sub> levels were significantly linked to up regulation and down regulation of ALP, ALT and AST levels in exposed population.

## Discussion

The serum ALT and ALP levels were considered to be specific for hepatocellular injury with a few exceptions [15]. However, the degree of enzyme levels classified into mild, moderate or markedly high levels can be helpful to distinguish between different causes of liver diseases [16]. Elevations of the serum AST were reported in viral hepatitis as well as other liver diseases [17, 18]. AST and ALT are the hepatic enzymes that catalyse the transfer of amino groups to form the hepatic metabolites pyruvate and oxaloacetate, respectively. Both the ALT and AST are released from damaged hepatocytes into the blood after hepatocellular injury or death leading to their higher concentration in blood [19]. Till now, most of the investigations were done to study the effect of environmental pollutants on lung diseases. Thus, in this study we have evaluated the impact of environmental pollutants such as NO<sub>2</sub>, RSPM and SPM present in air surrounding the oil drilling sites on liver abnormality or injury of the population living near

**Table 2. Comparison of air components concentration present in polluted area (oil drilling sites) and control site.**

| Sites          | RSPM (µg/m <sup>3</sup> ) | SPM (µg/m <sup>3</sup> ) | NO <sub>2</sub> (µg/m <sup>3</sup> ) | SO <sub>2</sub> (µg/m <sup>3</sup> ) |
|----------------|---------------------------|--------------------------|--------------------------------------|--------------------------------------|
| Unexposed area | 29.10±0.50                | 41.40±1.20               | 14.40±0.20                           | 0.02±0.01                            |
| Exposed area   | 69.80±0.40**              | 132.50±0.90**            | 26±0.70**                            | 0.86±0.04**                          |

All values are expressed as Mean ± SEM (Standard Error of Mean),

\*\* = Statistically significant with P <0.0001 (Values were expressed up to two decimal point).

doi:10.1371/journal.pone.0123370.t002

**Table 3. Comparison of biochemical tests of the entire seven variables among exposed and unexposed group by Student's t-test**

|           | ALP          | ALT          | AST          | TB                      | DB                      | TP                      | ALB                     |
|-----------|--------------|--------------|--------------|-------------------------|-------------------------|-------------------------|-------------------------|
| Unexposed | 190.40±5.59  | 25.96±1.79   | 31.00±2.22   | 1.04±0.13               | 0.28±0.04               | 6.62±0.08               | 4.07±0.04               |
| Exposed   | 48.04±7.18** | 59.30±4.90** | 61.02±3.90** | 0.81±0.05 <sup>NS</sup> | 0.27±0.02 <sup>NS</sup> | 6.80±0.17 <sup>NS</sup> | 3.08±0.08 <sup>NS</sup> |

All values are expressed as Mean ± SEM (Standard Error of Mean),

\*\* = Highly significant with P < 0.0001,

<sup>NS</sup> = Not Significant (Values were expressed up to two decimal point).

doi:10.1371/journal.pone.0123370.t003

those sites. Here, we have found that the presence of air pollutants in the environment does play an important role in liver abnormality or injury to the inhabitant as compared to control groups residing in non-polluted area.

The investigation carried out by Bai et al. (2004) [20] through haematoxylin eosin (HE) staining and transmission electron microscopy (TEM) analysis found that SO<sub>2</sub> inhalation can cause liver injury. Likewise, exposure to NO<sub>2</sub> also affects the microsomal electron-transport systems in the liver [21].

Different epidemiological studies reported the fine particles (10µM) are associated with most health problems, such as heart and lung diseases [22–24], diabetes [25], premature birth and low birth weight [26], cancer [27] and non-alcoholic fatty liver disease [28]. Much like particulate matters, ambient SO<sub>2</sub> concentration was associated with mortality [29], lung cancer [30], respiratory diseases [31, 32] and stillbirth [33]. Further, the ambient NO<sub>2</sub> concentrations were associated with pulmonary defects [34, 35], cardiovascular complications [36], mortality [37] and offspring's birth weight [38].

Our earlier studies on the same oil drilling site, we have recorded a higher level of iron, nickel, potassium, magnesium, calcium, manganese and selenium present in the soil samples as compared to control site. We also found a higher concentration of lead, arsenic and manganese in water samples collected from the same area [39]. Manganese, lead, mercury are found to have most vital hepatotoxic effect associated with up and down regulation of liver enzymes [40, 41]. Based on the biochemical analysis we found low-level of nutritional parameters such as protein, carbohydrates and lipids in the vegetables. In this study, we targeted the population of

**Table 4. Associative studies of alkaline phosphatase (ALP), alanine transaminase (ALT) and aspartate transaminase (AST) with the environmental variables by generalized regression analysis.**

| Enzymes | Variables       | Values of estimated Coefficient (β) | 95% Confidence Interval (CI) |
|---------|-----------------|-------------------------------------|------------------------------|
| ALP     | RSPM            | -3.498**                            | -3.934 to -3.062             |
|         | SPM             | -1.563**                            | -1.578 to -1.368             |
|         | NO <sub>2</sub> | -12.273**                           | -13.804 to -10.74            |
| ALT     | RSPM            | 0.819**                             | 0.589 to 1.049               |
|         | SPM             | 0.366**                             | 0.263 to 0.469               |
|         | NO <sub>2</sub> | 2.874**                             | 2.067 to 3.681               |
| AST     | RSPM            | 0.738**                             | 0.531 to 0.944               |
|         | SPM             | 0.329**                             | 0.237 to 0.422               |
|         | NO <sub>2</sub> | 2.588**                             | 1.862 to 3.313               |

\*\*Statistically significant P < 0.001.

Negative values indicates decrease in level.

doi:10.1371/journal.pone.0123370.t004

age group more than 30 years, so as to assess the long-term exposure effect of these pollutants on liver of that exposed group. The BMI of the exposed group when compared with the control group, it was recorded that the exposed population group are underweight (Table 1). We found the mean values of ALT ( $P < 0.0001$ ) and AST ( $P < 0.0001$ ) was higher whereas the

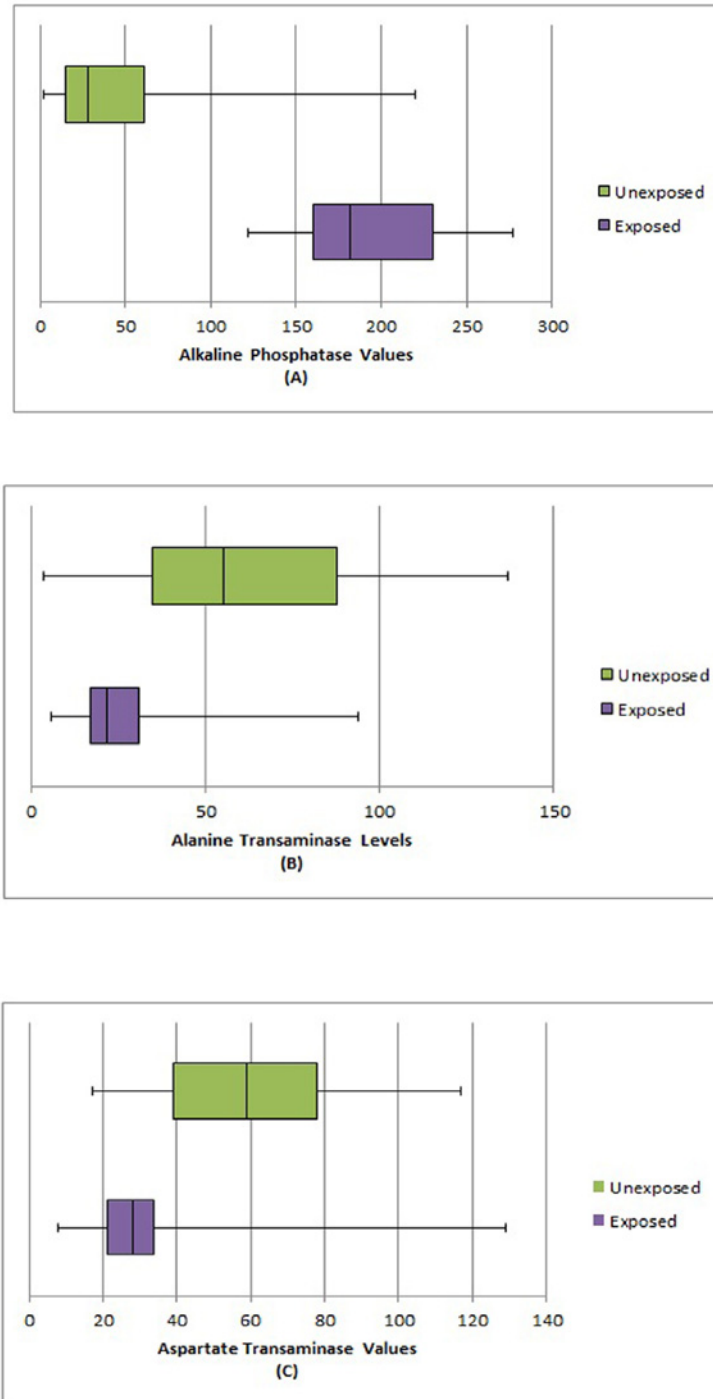

**Fig 1. (A, B, C) Box and Whisker plot of different liver enzymes level in unexposed and exposed population.**

doi:10.1371/journal.pone.0123370.g001

mean value of ALP ( $P < 0.0001$ ) was lower in exposed population as compared to control population. The box and whisker plots were shown for all three enzymes in Fig 1A, 1B and 1C.

Since the concentration of RSPM, SPM,  $\text{SO}_2$ ,  $\text{NO}_2$  were higher in the polluted area as compared to control area, we further evaluated the effect of these pollutants on ALP, AST and ALT level (taking the Student t-test's results as the basis) by generalized regression analysis. The generalized regression analysis between the pollutants and the liver parameters showed an increase in the RSPM level which led to significant decrease of 3.5 times ALP level (95% CI 3.1–3.9) in the population living near the polluted site. Similarly, the SPM level was found to be associated with the decrease of 1.5 times ALP level (95% CI 1.4–1.8) in exposed population as compared to control population (Table 4). The  $\text{NO}_2$  level was associated with a 12 times decrease in the ALP level (95% CI 10.74 to 13.804) in the exposed population (Table 4). Whereas, the increase of RSPM level was associated with increased blood ALT level by 0.8 times (95% CI 1.049 to 0.589) and an increase of the  $\text{NO}_2$  level (Table 2) increased the ALT level by 2.8 times (95% CI 2.067 to 3.681) (Table 4). The increase in  $\text{NO}_2$  level (Table 2) was also associated with increased AST level by 2.5 times (95% CI 1.862–3.313).

As our study was an epidemiological approach there were certain limitations. Liver biopsy of the consent populations having abnormal liver enzymes was not possible for us. We did not have any emphasis on the gender and occupation of the exposed population and only considered their long-term exposure as they have stayed in that polluted area since birth. Further studies based on clinical approach of the present findings on pathways relating gaseous pollutants and liver enzymes will be useful.

## Conclusion

The long term exposure of particulate matter and gaseous pollutants may play an important role in liver physiology of the inhabitant population living near the polluted sites.

## Acknowledgments

The authors are thankful to the Director, CSIR- North-East Institute of Science & Technology, Jorhat, Assam, India, for his support to carry out this work and CSIR, Government of India, New Delhi for financing the network project (BSC-0116).

## Author Contributions

Conceived and designed the experiments: TD BGU PKB TB. Performed the experiments: TD PKB TB DO KG. Analyzed the data: MJK TD MB MK JK. Contributed reagents/materials/analysis tools: DO PKB TB BGU. Wrote the paper: TD MB BGU JK.

## References

1. Goldstein BD, Osofsky HJ, Lichtveld MY. The Gulf oil spill. *N Engl J Med*. 2011; 364: 1334–1348. doi: [10.1056/NEJMra1007197](https://doi.org/10.1056/NEJMra1007197) PMID: [21470011](https://pubmed.ncbi.nlm.nih.gov/21470011/)
2. Chinn S, Jarvis D, Luczynska CM, Liebrich UA, Anto JM, Cerveri I, et al. An increase in bronchial responsiveness is associated with continuing or restarting smoking. *Am J Respir Crit Care Med*. 2005; 172: 956–961. PMID: [16020802](https://pubmed.ncbi.nlm.nih.gov/16020802/)
3. Brunekreef B, Holgate ST. Air pollution and health. *Lancet* 2002; 360:1233–1242. PMID: [12401268](https://pubmed.ncbi.nlm.nih.gov/12401268/)
4. Zock JP, Trigo GR, Rodriguez ER, Alonso AS, Espinosa A, Rodriguez FP, et al. Evaluation of the persistence of functional and biological respiratory health effects in clean-up workers 6years after the Prestige oil spill. *Environ Int* 2014; 62: 72–77. doi: [10.1016/j.envint.2013.09.020](https://doi.org/10.1016/j.envint.2013.09.020) PMID: [24184661](https://pubmed.ncbi.nlm.nih.gov/24184661/)
5. Kim JJ, Smorodinsky S, Lipsett M, Singer BC, Hodgson AT, Ostro B. Traffic-related air pollution near busy roads: the east bay children's respiratory health study. *Am J Respir Crit Care Med* 2004; 170: 520–526. PMID: [15184208](https://pubmed.ncbi.nlm.nih.gov/15184208/)



6. Amdur MO, Melvin WW, Drinker P. Effects of inhalation of sulfur dioxide by man. *Lancet* 1953; 2:758–759.
7. Schwartz J, Dockery DW. Increased mortality in Philadelphia associated with daily air pollution concentrations. *Am Rev Respir Dis* 1992; 145: 600–604. PMID: [1546841](#)
8. Adams WC, Brookes KA, Schelegle ES. Effects of NO<sub>2</sub> alone and in combination with O<sub>3</sub> on young men and women. *J Appl Physiol* 1987; 62: 1698–1704. PMID: [3597241](#)
9. Folinsbee LJ, Bedi JF, Horvath SM. Combined effects of ozone and nitrogen dioxide on respiratory function in man. *Am Ind Hyg Assoc J* 1981; 42: 534–541. PMID: [7246428](#)
10. Bauer MA, Utell MJ, Morrow PE, Speers DM, Gibb FR. Inhalation of 0.30 ppm nitrogen dioxide potentiates exercise-induced bronchospasm in asthmatics. *Am Rev Respir Dis* 1986; 134: 1203–1208. PMID: [3789520](#)
11. Koenig JQ, Covert DS, Smith MS, Belle GV, Pierson WE. The pulmonary effects of ozone and nitrogen dioxide alone and in combination in healthy and asthmatic adolescent subjects. *Toxicol Ind Health* 1988; 4: 521–532. PMID: [3188048](#)
12. Bhattacharjee M, Unni BG, Das S, Deka M, Rao PG. Lung function decline: Screening of alpha 1 anti-trypsin gene in a population exposed to coal dust. *Int J Biotechnol Mol Biol Res* 2011; 2(11):195–201.
13. Dey T, Gogoi K, Unni BG, Kalita M, Bharadwaz M, Bhattacharjee M, et al. Role of Glutathione S Transferase polymorphism in COPD with special reference to peoples living in the vicinity of the open cast coal mine of Assam. *PLOS ONE* 2014; 9(5): e96739. doi: [10.1371/journal.pone.0096739](#) PMID: [24809844](#)
14. Longo DL, Fauci AS, Kasper DL, Hauser SL, Jameson JL, Loscalzo J. *Harrison's principles of internal medicine: 18th ed.* New York: McGraw-Hill Professional; 2011
15. Minuk GY. Canadian association of gastroenterology practical guidelines: Evaluation of abnormal liver enzyme tests. *Can J Gastroenterol* 1998; 12 (6): 417–421. PMID: [9784897](#)
16. Krier M, Ahmed A. The asymptomatic outpatient with abnormal liver function tests. *Clin Liver Dis* 2009; 13: 167–177. doi: [10.1016/j.cld.2009.02.001](#) PMID: [19442912](#)
17. Ritis FD, Giusti G, Piccinino F, Cacciatore L. Biochemical Laboratory Tests in Viral Hepatitis and other Hepatic Diseases Evaluation and Follow-Up. *Bull. Wld Hlth Org* 1965; 32:59–72.
18. Wroblewski F. The clinical significance of transaminase activities of serum. *Am J Med* 1959; 27: 911–923. PMID: [13846130](#)
19. American Gastroenterological Association Clinical Practice Committee. AGA technical review on the evaluation of liver chemistry tests. *Gastroenterology* 2002; 123: 1367–1384 PMID: [12360498](#)
20. Bai JY, Meng ZQ. Sulfur dioxide-induced liver pathology. *Zhonghua Bing Li Xue Za Zhi* 2004; 33(2): 155–157. PMID: [15132855](#)
21. Takahashi Y, Mochitate K, Miura T. Subacute effects of nitrogen dioxide on membrane constituents of lung, liver, and kidney of rats. *Environ Res* 1986; 41(1):184–194. PMID: [3019657](#)
22. Cendon S, Pereira LAA, Braga ALF, Conceic GMS, Junior AC, Romaldini H, et al. Air pollution effects on myocardial infarction. *Rev Saude Publica* 2006; 40:414–9. PMID: [16810364](#)
23. Villeneuve P, Chen L, Rowe B, Coates F. Outdoor air pollution and emergency department visits for asthma among children and adults: A case crossover study in Northern Alberta, Canada. *Environ Health* 2007; 6: 40–55. PMID: [18157917](#)
24. Modig L, Jarvholm B, Ronnmark E, Nystrom L, Lundback B, Andersson C, et al. Vehicle exhaust exposure in an incident case control study of adult asthma. *Eur Respir J* 2006; 28:75–80. PMID: [16540504](#)
25. Filho MAP, Pereira LAA, Arbex FF, Arbex M, Conceic GM, Santos UP, et al. Effect of air pollution on diabetes and cardiovascular diseases in Sao Paulo, Brazil. *Brazilian J Med Biolo Research* 2008; 41:526–532. PMID: [18560673](#)
26. Brauer M, Lencar C, Tamburic L, Koehoorn M, Paul D, Karr C. A cohort study of traffic related air pollution impacts on birth outcomes. *Environ Health Perspect* 2008; 116(5): 680–686. doi: [10.1289/ehp.10952](#) PMID: [18470315](#)
27. Nielsen OR, Hertel O, Thomsen BL, Olsen JH. Air pollution from traffic at the residence of children with cancer. *Am J Epidemiol* 2001; 153:433–443. PMID: [11226975](#)
28. Tan HH, Fiel MI, Sun Q, Guo J, Gordon RE, Chen LC, et al. Kupffer cell activation by ambient air particulate matter exposure may exacerbate non-alcoholic fatty liver disease. *J Immunotoxicol* 2009; 6(4): 266–275. doi: [10.1080/15476910903241704](#) PMID: [19908945](#)
29. Kana H, Wongb CM, Qiand VVJN, the PAPA Project Team. Short-term association between sulfur dioxide and daily mortality: the public health and air pollution in Asia (PAPA) study. *Environ Res* 2010; 110(3): 258–264. doi: [10.1016/j.envres.2010.01.006](#) PMID: [20122685](#)



30. Tseng CY, Huang YC, Su SY, Huang JY, Lai CH, Lung CC, et al. Cell type specificity of female lung cancer associated with sulfur dioxide from air pollutants in Taiwan: An ecological study. *BMC Public Health* 2012; 12:4. doi: [10.1186/1471-2458-12-4](https://doi.org/10.1186/1471-2458-12-4) PMID: [22214195](https://pubmed.ncbi.nlm.nih.gov/22214195/)
31. Smargiassi A, Kosatsky T, Hicks J, Plante C, Armstrong B, Villeneuve PJ, et al. Risk of Asthmatic Episodes in Children Exposed to Sulfur Dioxide Stack Emissions from a Refinery Point Source in Montreal, Canada. *Environ Health Perspect* 2009; 117: 653–659. doi: [10.1289/ehp.0800010](https://doi.org/10.1289/ehp.0800010) PMID: [19440507](https://pubmed.ncbi.nlm.nih.gov/19440507/)
32. Osterman JW, Greaves IA, Smith TJ, Hammond SK, Robins JM, Theriault G. Respiratory symptoms associated with low level sulphur dioxide exposure in silicon carbide production workers. *Br J Ind Med* 1989; 46:629–635. PMID: [2789966](https://pubmed.ncbi.nlm.nih.gov/2789966/)
33. Faiz AS, Rhoads GG, Demissie K, Kruse L, Lin Y, Rich DQ, et al. Ambient air pollution and the risk of stillbirth. *Am J Epidemiol* 2012; 176(4):308–316. doi: [10.1093/aje/kws029](https://doi.org/10.1093/aje/kws029) PMID: [22811493](https://pubmed.ncbi.nlm.nih.gov/22811493/)
34. Belanger K, Holford TR, Gent JF, Hill ME, Kezik JM, Leaderer BP. Household levels of nitrogen dioxide and pediatric asthma severity. *Epidemiology* 2013; 24(2):320–330. doi: [10.1097/EDE.0b013e318280e2ac](https://doi.org/10.1097/EDE.0b013e318280e2ac) PMID: [23337243](https://pubmed.ncbi.nlm.nih.gov/23337243/)
35. Roger LJ, Horstman DH, McDonnell WF, Kehrl HR, Ives PJ, Seal E, et al. Pulmonary function, airway responsiveness and respiratory symptoms in asthmatics following exercise in NO<sub>2</sub>. *Toxicol Ind. Health* 1990; 6:155–171. PMID: [2349573](https://pubmed.ncbi.nlm.nih.gov/2349573/)
36. Williamsa R, Brookb R, Bardb R, Connera T, Shinc H, Burnett R. Impact of personal and ambient-level exposures to nitrogen dioxide and particulate matter on cardiovascular function. *Int J Environ Health Res* 2012; 22(1): 71–91. doi: [10.1080/09603123.2011.588437](https://doi.org/10.1080/09603123.2011.588437) PMID: [21711166](https://pubmed.ncbi.nlm.nih.gov/21711166/)
37. Tao Y, Huang W, Huang X, Zhong L, Lu SE, Li Y, et al. Estimated acute effects of ambient ozone and nitrogen dioxide on mortality in the pearl river delta of Southern China. *Environ Health Perspect* 2012; 120:393–398. doi: [10.1289/ehp.1103715](https://doi.org/10.1289/ehp.1103715) PMID: [22157208](https://pubmed.ncbi.nlm.nih.gov/22157208/)
38. Lepeule J, Caini F, Bottagisi S, Galineau J, Hulin A, Marquis N, et al. Maternal exposure to nitrogen dioxide during pregnancy and offspring birth weight: comparison of two exposure models. *Environ Health Perspect* 2010; 118: 1483–1489. doi: [10.1289/ehp.0901509](https://doi.org/10.1289/ehp.0901509) PMID: [20472526](https://pubmed.ncbi.nlm.nih.gov/20472526/)
39. Das A, Unni BG, Bhattacharjee M, Baruah PK, Das S, Wann SB, et al. Evaluation of heavy metal exposure in oil drilling sites. *Res J Chem Environ* 2011; 15(2): 91–94.
40. Deng Q, Liu J, Li Q, Chen K, Liu Z, Shen Y, et al. Interaction of occupational manganese exposure and alcohol drinking aggravates the increase of liver enzyme concentrations from a cross-sectional study in China. *Environmental Health* 2013; 12:30 doi: [10.1186/1476-069X-12-30](https://doi.org/10.1186/1476-069X-12-30) PMID: [23587294](https://pubmed.ncbi.nlm.nih.gov/23587294/)
41. Cave M, Appana S, Patel M, Falkner KC, McClain CJ, Brock G. Polychlorinated Biphenyls, Lead, and Mercury Are Associated with Liver Disease in American Adults: NHANES 2003–2004. *Environ Health Perspect* 2010; 18 (12): 1735–1742.
